# Supplementary material
Source: publisher figshare collection journal article supplement (https://frontiersin.figshare.com/ndownloader/files/14395580)
Supplement: Supplementary file 1 [file 14395580]

## Sheet: Feuil1
Experiment label	Plant	Number of alive Hd females (day6)	Number of recovered Ha larvae	Number of parasitized Ha larvae	% parasitism
M1_Ha (06/2013)	Alfalfa	6	33	33	1
M2_Ha (06/2013)	Alfalfa	3	52	39	0.75
M3_Ha (07/2013)	Alfalfa	2	9	9	1
M4_Ha (07/2013)	Alfalfa	6	22	19	0.863636
M5_Ha (07/2013)	Alfalfa	1	26	16	0.615385
M1_Ha (06/2013)	chickpeas	1	39	1	0.025641
M2_Ha (06/2013)	chickpeas	0	30	3	0.1
M3_Ha (07/2013)	chickpeas	1	2	1	0.5
M4_Ha (07/2013)	chickpeas	0	4	0	0
M5_Ha (07/2013)	chickpeas	6	0	0	/
M1_Ha (06/2013)	corn	2	27	9	0.333333
M2_Ha (06/2013)	corn	3	21	7	0.333333
M3_Ha (07/2013)	corn	1	7	7	1
M4_Ha (07/2013)	corn	4	20	16	0.8
M5_Ha (07/2013)	corn	0	21	12	0.571429
